# Supplementary material for: Microfluidic system for simultaneous optical measurement of platelet aggregation at multiple shear rates in whole blood
Source: Royal Society of Chemistry journal article supplement (doi:10.1039/c2lc21145a), 2012-01-01
Supplement: c2lc21145a.pdf [file c2lc21145a.pdf]

Manuscript ID LC-ART-11-2011-021145

Title: Microfluidic system for simultaneous optical measurement of platelet aggregation at multiple shear rates in whole blood

Electronic Supplementary Information

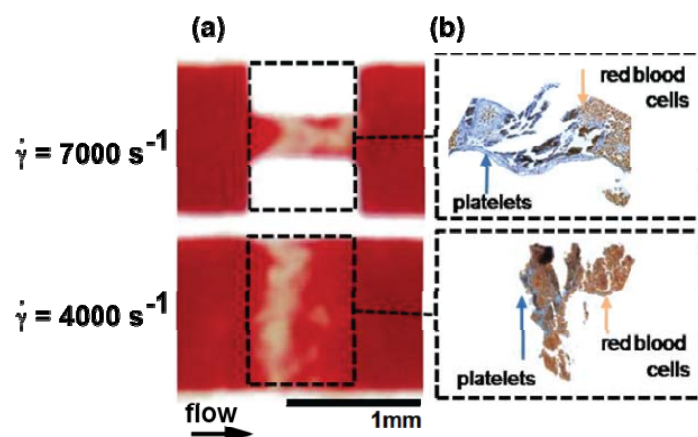

**Supp. Fig. 1** Microscopy images (a) of thrombi formed within device stenoses at higher shear rate,  $7000 \text{ s}^{-1}$  (*top*) and lower shear rate,  $4000 \text{ s}^{-1}$  (*bottom*). Subsequent histology (b) via Carstairs staining reveals expected platelet thrombi (stained blue) at high shear rate and red blood cells (stained orange/red) mixed with platelets in thrombi at the lower shear rate.
